# Supplementary material for: A Phase I trial of talazoparib in patients with advanced hematologic malignancies
Source: PubMed Central journal article supplement (PMC8609999; doi:10.2217/ijh-2021-0004), 2021-10-22

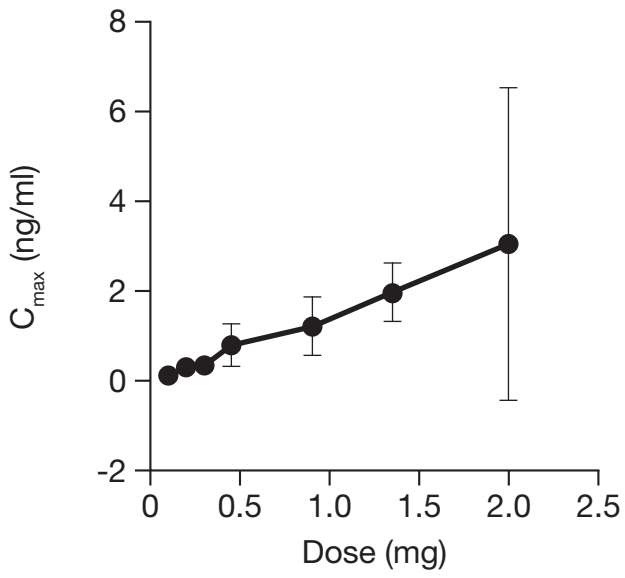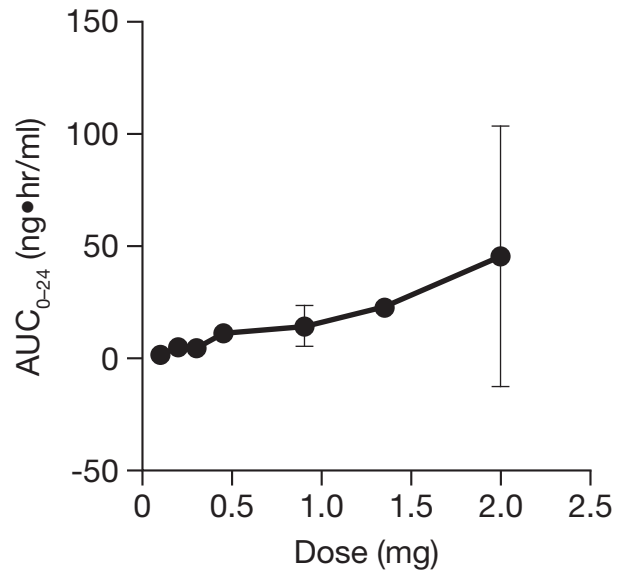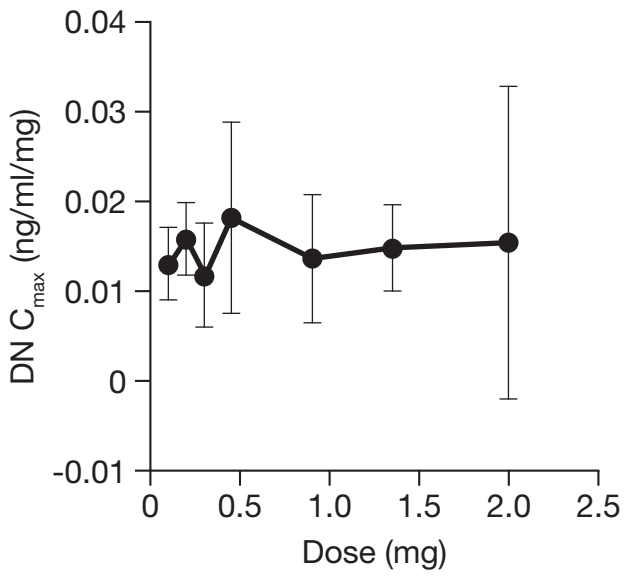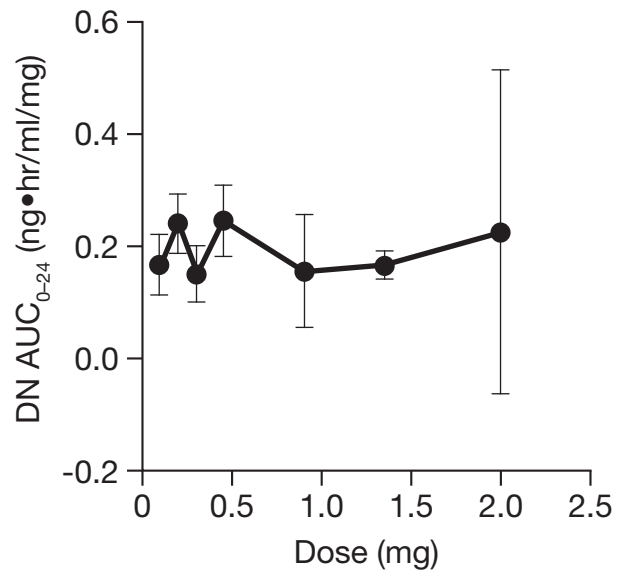

Supplement: ijh-10-35-s1.pdf [file ijh-10-35-s1.pdf]
